# Supplementary material for: Network based analysis of hepatitis C virus Core and NS4B protein interactions
Source: Royal Society of Chemistry journal article supplement (doi:10.1039/c0mb00103a), 2010-10-18
Supplement: c0mb00103a_4.pdf [file c0mb00103a_4.pdf]

**Supplementary Table S4: Comparison of Core membrane protein Y2H and Core de Chasse extended PPI network attributes and KEGG pathway associations**

| <b>Attributes</b>                                           | <b>Core membrane protein Y2H network (A)</b> | <b>Core de Chassey PPI network (B)</b> |
|-------------------------------------------------------------|----------------------------------------------|----------------------------------------|
| No. of genes                                                | 208                                          | 1876                                   |
| No of interactions                                          | 1063                                         | 14297                                  |
| Characateristic path length                                 | 2.908                                        | 2.975                                  |
| Average number of neighbours                                | 9.75                                         | 14.7                                   |
| No. of enriched KEGG pathway associations ( $p \leq 0.05$ ) | 24                                           | 87                                     |

**Enriched KEGG pathway associations ( $p \leq 0.05$ ) common to Core networks A and B**

| <b>KEGG Pathway</b>                                        | <b>KEGG pathway ID</b> | <b>KEGG pathway type</b> |
|------------------------------------------------------------|------------------------|--------------------------|
| Oxidative phosphorylation                                  | hsa00190               | Energy metabolism        |
| MAPK signaling pathway                                     | hsa04010               | Signal transduction      |
| Apoptosis                                                  | hsa04210               | Cell growth and death    |
| Toll-like receptor signaling pathway                       | hsa04620               | Immune system            |
| NOD-like receptor signaling pathway                        | hsa04621               | Immune system            |
| RIG-I-like receptor signaling pathway                      | hsa04622               | Immune system            |
| Cytosolic DNA-sensing pathway                              | hsa04623               | Immune system            |
| T cell receptor signaling pathway                          | hsa04660               | Immune system            |
| Neurotrophin signaling pathway                             | hsa04722               | Nervous system           |
| Adipocytokine signaling pathway                            | hsa04920               | Endocrine system         |
| Epithelial cell signaling in Helicobacter pylori infection | hsa05120               | Infectious diseases      |
| Pathogenic Escherichia coli infection                      | hsa05130               | Infectious diseases      |
| Pancreatic cancer                                          | hsa05212               | Cancers                  |
| Prostate cancer                                            | hsa05215               | Cancers                  |
| Chronic myeloid leukemia                                   | hsa05220               | Cancers                  |
| Acute myeloid leukemia                                     | hsa05221               | Cancers                  |
| Small cell lung cancer                                     | hsa05222               | Cancers                  |
